# Supplementary material for: Real-time coastal flood hazard assessment using DEM-based hydrogeomorphic classifiers
Source: Copernicus journal article supplement (doi:10.5194/nhess-22-1419-2022), 2022-04-21
Supplement: Supplementary file 1 [file nhess-22-1419-2022-supplement.pdf]

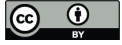

*Supplement of*

## **Real-time coastal flood hazard assessment using DEM-based hydrogeomorphic classifiers**

**Keighobad Jafarzadegan et al.**

*Correspondence to:* Keighobad Jafarzadegan (kjafarzadegan@ua.edu)

The copyright of individual parts of the supplement might differ from the article licence.

# 1 Supplementary Material

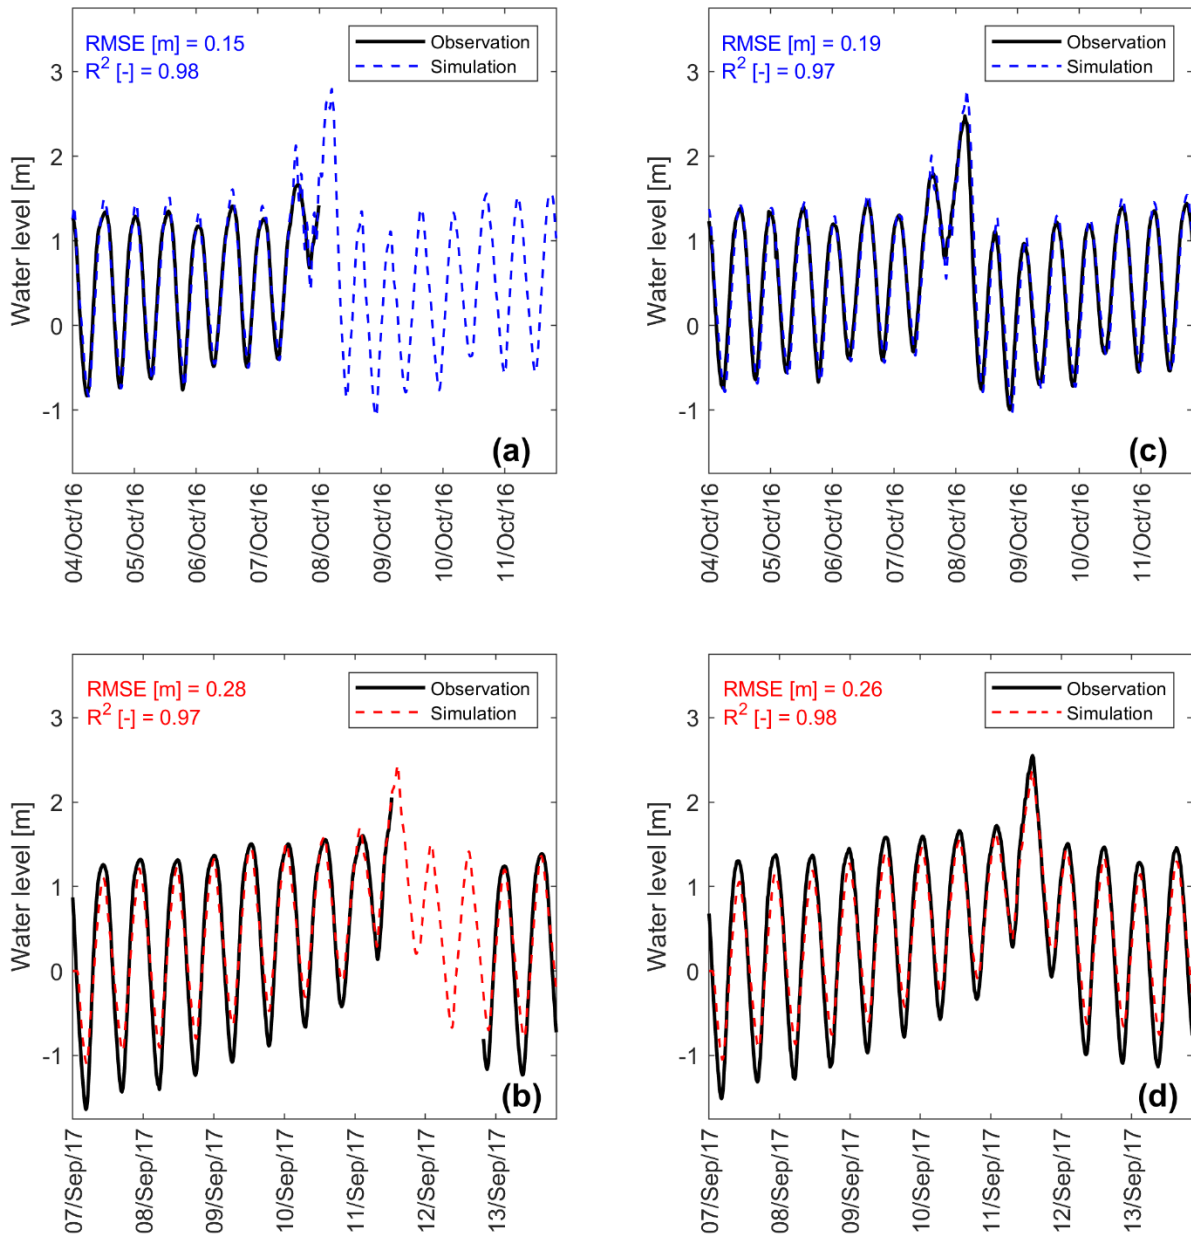

2

3 **Figure S1.** Calibration and validation of the Savannah Delft3D-FM model. Time series of  
4 simulated and observed WLS at (a, b) Port Wentworth and (c, d) Savannah River at USACE dock.

5 Top and bottom panel show times series of Hurricane Matthew and Irma, respectively. Note that  
6 the model can simulate water level variability, and so fill the data gaps observed during Hurricane  
7 Matthew.
